# Supplementary material for: Inorganic/organic mesostructure directed synthesis of wire/ribbon-like polypyrrole nanostructuresElectronic supplementary information (ESI) available: FT-IR spectra, powder XRD pattern and conductivities of as-made PPy nanostructures. See http://www.rsc.org/suppdata/cc/b4/b405255b/
Source: Royal Society of Chemistry journal article supplement (doi:10.1039/b405255b), 2004-01-01
Supplement: b405255b.doc [file b405255b.doc]

# Supporting Information

# I. Fourier transform infrared (FTIR) spectra showed a broad band at 3000 - 3500 cm-1 attributed to N-H and C-H stretching vibrations; while strong peaks near 1195 and 920 cm-1 indicated the doping state of polypyrrole; and peaks at 1050 cm-1 and 1315 cm-1 were attributed to the C-H deformation vibrations and C-N stretching vibrations, respectively. In addition, the peaks at 1560 cm-1 and 1480 cm-1 corresponded to the antisymmetric and symmetric ring-stretching modes, respectively. The two very weak peaks around 2924 cm-1 and 2854 cm-1 were attributed to the stretching vibration mode of methylene, indicating that surfactants had been almost completely eliminated from the PPy 1D nanostructures.

**II. The following figure shows the powder XRD pattern of as-made PPy nanostructures, which indicates the PPy nanostructures are amorphous and the lamellar mesostructures of (CTA)2S2O8 are completely disappeared.**

**III. Conductivities of the PPy 1D nanostructures were measured with the standard Van Der Pauw direct current (DC) four-probe method. PPy 1D nanostructures showed typical non-metallic behavior with a room temperature conductivity of 7.3×10-3 Scm-1. The low room temperature conductivity of PPy 1D nanostructures was ascribed to the low degree of doping. The overall pattern of temperature dependent conductivity of polypyrrole is well described by Mott’s law for quasi one-dimensional variable-range hopping.**
